# Supplementary material for: Identification of a neutrophil-related gene expression signature that is enriched in adult systemic lupus erythematosus patients with active nephritis: Clinical/pathologic associations and etiologic mechanisms
Source: PubMed Central journal article supplement (PMC5942792; doi:10.1371/journal.pone.0196117), 2018-05-09
Supplement: pone.0196117.s001.pdf [file pone.0196117.s001.pdf]

**S1 Table. Genes differentially expression between active SLE patients and healthy controls.**

| Gene Symbol | Gene Name                                                        | Lupus vs Control                |          | Renal vs Non-renal              |          |
|-------------|------------------------------------------------------------------|---------------------------------|----------|---------------------------------|----------|
|             |                                                                  | Fold-change (Log <sub>2</sub> ) | q value  | Fold-change (Log <sub>2</sub> ) | q value  |
| IFI27       | interferon-alpha inducible protein 27                            | 3.303274                        | 0.023204 | -0.72399                        | 0.512609 |
| IFI44L      | IFN-induced protein 44-like                                      | 3.176316                        | 0.023204 | -0.9631                         | 0.361021 |
| NRIR        | negative regulator of interferon response (non-protein encoding) | 2.694824                        | 0.023204 | -0.7609                         | 0.361918 |
| RSAD2       | radical S-adenosyl methionine domain containing 2                | 2.595622                        | 0.023204 | -0.69023                        | 0.422425 |
| IFI44       | IFN-induced protein 44                                           | 2.550249                        | 0.036486 | -0.6765                         | 0.445664 |
| IFIT1       | interferon induced protein with tetra-ricopeptide repeats 1      | 2.335846                        | 0.083659 | -0.68017                        | 0.47248  |
| CMPK2       | cytokine monophosphate (UMP-CMP) kinase 2, mitochondrial         | 2.215621                        | 0.030238 | -0.56137                        | 0.456005 |
| OAS3        | 2'-5' oligoadenylate synthase 3                                  | 2.186463                        | 0.044115 | -0.76725                        | 0.347388 |
| HERC5       | HECT and RLD domain containing E3 ubiquitin protein ligase 5     | 2.081185                        | 0.040468 | -0.51354                        | 0.500747 |
| OAS1        | 2'-5' oligoadenylate synthase 1                                  | 1.975429                        | 0.031879 | -0.72232                        | 0.296238 |
| LY6E        | lymphocyte antigen 6 complex , locus E                           | 1.878187                        | 0.060042 | -1.01733                        | 0.212435 |
| CCL2        | monocyte chemotactic proteins -1                                 | 1.844947                        | 0.023204 | -1.30351                        | 0.154865 |
| EPST11      | epithelial stromal interaction 1                                 | 1.818155                        | 0.042211 | -0.30873                        | 0.664127 |
| IFI6        | interferon-alpha inducible protein 6                             | 1.768846                        | 0.044115 | -0.68225                        | 0.306679 |
| DDX60       | DEXD/H box RNA helicase 60                                       | 1.761375                        | 0.040468 | -0.47369                        | 0.459158 |
| IFIT3       | interferon-induced protein with tetra-ricopeptide repeats 3      | 1.718507                        | 0.051104 | -0.49202                        | 0.448678 |
| MX1         | myxovirus resistance 1                                           | 1.67446                         | 0.040468 | -0.56973                        | 0.349106 |
| OAS2        | 2'-5' oligoadenylate synthase 2                                  | 1.65719                         | 0.083659 | -0.61326                        | 0.361107 |
| HIST1H3G    | histone cluster 1, H3g                                           | 1.655218                        | 0.040468 | 0.092961                        | 0.894518 |
| SIGLEC1     | sialic acid binding Ig-like lectin 1, sialoadhesin               | 1.607836                        | 0.051973 | -0.52245                        | 0.394001 |
| XAF1        | XIAP associated factor 1                                         | 1.500866                        | 0.040468 | -0.61302                        | 0.274892 |
| RNASE2      | Rnase A Family, 2 (liver, eosinophil-derived neurotoxin)         | 1.477618                        | 0.040468 | -0.07797                        | 0.902713 |
| HERC6       | HECT and RLD domain containing E3 ubiquitin protein ligase 6     | 1.461951                        | 0.044115 | -0.62684                        | 0.265837 |
| EIF2AK2     | double-stranded RNA-dependent protein kinase                     | 1.423925                        | 0.023204 | -0.35567                        | 0.445455 |
| USP18       | ubiquitin specific peptidase 18                                  | 1.348654                        | 0.023204 | -0.48634                        | 0.26856  |
| RRM2        | ribonucleotide reductase regulatory subunit M2                   | 1.348315                        | 0.051973 | 0.216724                        | 0.693055 |
| RTP4        | receptor transporter protein 4                                   | 1.310735                        | 0.040468 | -0.48401                        | 0.314328 |
| PLSCR1      | phospholipid scramblase 1                                        | 1.269274                        | 0.040468 | -0.34295                        | 0.456493 |
| SPATS2L     | spermatogenesis associated serine-rich 2-like                    | 1.227902                        | 0.009411 | -0.4488                         | 0.230413 |
| OASL        | 2'-5'-oligoadenylate synthetase like                             | 1.182053                        | 0.089906 | -0.31785                        | 0.513523 |
| SAMD9L      | sterile alpha motif domain containing 9-like                     | 1.144724                        | 0.023204 | -0.31422                        | 0.404008 |
| LAP3        | leucine aminopeptidase 3                                         | 1.116535                        | 0.079059 | -0.46154                        | 0.306679 |
| ISG15       | ISG15 ubiquitin-like modifier                                    | 1.099692                        | 0.094418 | -0.34761                        | 0.445664 |
